# Supplementary material for: The TβR II-targeted aptamer S58 prevents fibrosis after glaucoma filtration surgery
Source: publisher site journal article supplement (doi:10.18632/aging.102997), 2020-05-23
Supplement: Supplementary file [file aging-v12i10-102997-supplementary-material-SD2.pdf]

## SUPPLEMENTARY TABLE

**Supplementary Table 1. Primer sequences.**

|                                     |                |                         |
|-------------------------------------|----------------|-------------------------|
| Vimentin/VIM                        | Forward Primer | GACGCCATCAACACCGAGTT    |
|                                     | Reverse Primer | CTTTGTCGTTGGTTAGCTGGT   |
| FSP-1/S100A4                        | Forward Primer | ACTTGGACAGCAACAGGGACA   |
|                                     | Reverse Primer | TTCCTGGGCTGCTTATCTGG    |
| CTGF/CCN2                           | Forward Primer | GAGCCCAAGGACCAAACCG     |
|                                     | Reverse Primer | TGGAGATGCCCATCCCACA     |
| COL3A1 collagen type III<br>alpha 1 | Forward Primer | CTTCTCTCCAGCCGAGCTTC    |
|                                     | Reverse Primer | AATGTTTCCTACCGTGCAACC   |
| B-actin/Actb                        | Forward Primer | CATGTACGTTGCTATCCAGGC   |
|                                     | Reverse Primer | CTCCTTAATGTACGCACGAT    |
| MMp9                                | Forward Primer | TACAGGATCATTGGCTACACACC |
|                                     | Reverse Primer | GGTCACATCGCTCCAGACT     |
| MMp2                                | Forward Primer | TACAGGATCATTGGCTACACACC |
|                                     | Reverse Primer | GGTCACATCGCTCCAGACT     |
| TIMP1                               | Forward Primer | ACCACCTTATACCAGCGTTATGA |
|                                     | Reverse Primer | GGTGTAGACGAACCGGATGTC   |
| $\alpha$ -SMA/Acta2a                | Forward Primer | GATGCTCCCAGGGCTGTTTT    |
|                                     | Reverse Primer | CCTCTTTTGCTCTGTGCTTCGTC |
| collage1/COL1A1                     | Forward Primer | GAGGGCCAAGACGAAGACATC   |
|                                     | Reverse Primer | CAGATCACGTCATCGCACAAC   |
| TIMP2                               | Forward Primer | GCTGCGAGTGCAAGATCAC     |
|                                     | Reverse Primer | TGGTGCCCGTTGATGTTCTTC   |
| fibronectin/FN1                     | Forward Primer | AGGAAGCCGAGGTTTTAACTG   |
|                                     | Reverse Primer | AGGACGCTCATAAGTGTCACC   |
| N-cadherin/CDH2                     | Forward Primer | TCAGGCGTCTGTAGAGGCTT    |
|                                     | Reverse Primer | ATGCACATCCTTCGATAAGACTG |
